# UMI-Gen: a UMI-based reads simulator for variant calling evaluation in paired-end sequencing NGS libraries

Vincent Sater   Pierre-Julien Vailly   Thierry Lecroq  
Philippe Ruminy   Caroline Bérard   Élise Prieur-Gaston   Fabrice Jardin

## 1 Disclaimer

The author has withdrawn version 2 of this manuscript due to a duplicate posting of manuscript number 027532. Therefore, the author does not wish this work to be cited as reference for the project. 775817v1 is the appropriate submission and the published version of the appropriate preprint can be found in the published article link. If you have any questions, please contact the corresponding author.
